# Supplementary material for: Functional characterization and expression study of sugarcane MYB transcription factor gene PEaMYBAS1 promoter from Erianthus arundinaceus that confers abiotic stress tolerance in tobacco
Source: Royal Society of Chemistry journal article supplement (doi:10.1039/c5ra21414a), 2016-01-01
Supplement: c5ra21414a1.pdf [file c5ra21414a1.pdf]

**Supplementary Table I:** GUS activities of different deletion fragments of promoter *PEaMYBAS1* in transient tobacco leaf discs.

| Fragment | GUS activities in control and test samples |              |              |             |              |
|----------|--------------------------------------------|--------------|--------------|-------------|--------------|
|          | Mock(control)                              | Drought      | Cold         | Salt        | Wounding     |
| F0       | 51.96±8.97                                 | 307.00±7.68  | 254.12±1.99  | 253.51±7.98 | 211.11±19.84 |
| F6       | 40.74±3.92                                 | 177.37±17.97 | 183.43±7.70  | 183.13±1.89 | 159.48±15.05 |
| F5       | 35.50±21.01                                | 124.30±21.38 | 132.16±8.97  | 148.55±4.68 | 121.47±8.64  |
| F4       | 29.23±22.95                                | 97.99±21.12  | 105.04±15.49 | 114.41±3.34 | 73.63±11.80  |
| F3       | 22.17±15.73                                | 55.72±27.40  | 44.58±7.47   | 58.59±4.68  | 50.16±18.43  |
| F2       | 11.23±6.49                                 | 15.13±3.73   | 15.50±19.47  | 26.09±1.89  | 22.31±16.25  |
| F1       | 8.49±2.09                                  | 11.22±9.34   | 9.22±15.53   | 17.01±7.98  | 10.83±9.87   |

Values are mean of three experiments ± SD;

Where, F1, F2, F3, F4, F5, F6 and F0 are deletion fragments of promoter *PEaMYBAS1*  
GUS activity in nmol 4-PNP/mg protein/min

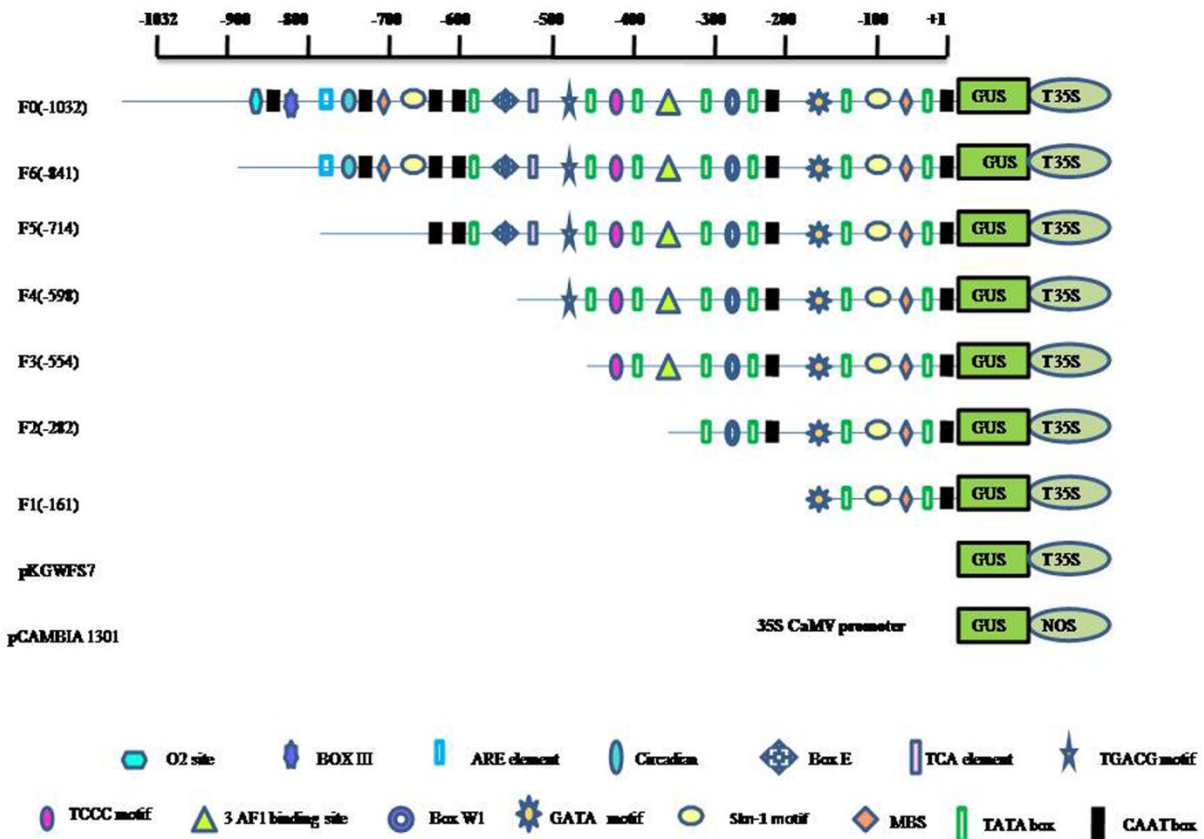

**Supplementary Fig. I:** Schematic representation of *PEaMYBAS1* promoter constructs for assaying GUS expression in tobacco leaves. The serially 5'-deleted promoter constructs of the *PEaMYBAS1* were fused to the GUS reporter gene in the vector pKGWFS7
